# Supplementary material for: HOXD-AS1 promotes the epithelial to mesenchymal transition of ovarian cancer cells by regulating miR-186-5p and PIK3R3
Source: Springer Nature journal article supplement (doi:10.1186/s13046-019-1103-5), 2019-03-01
Supplement: MOESM2 [file 16520600]

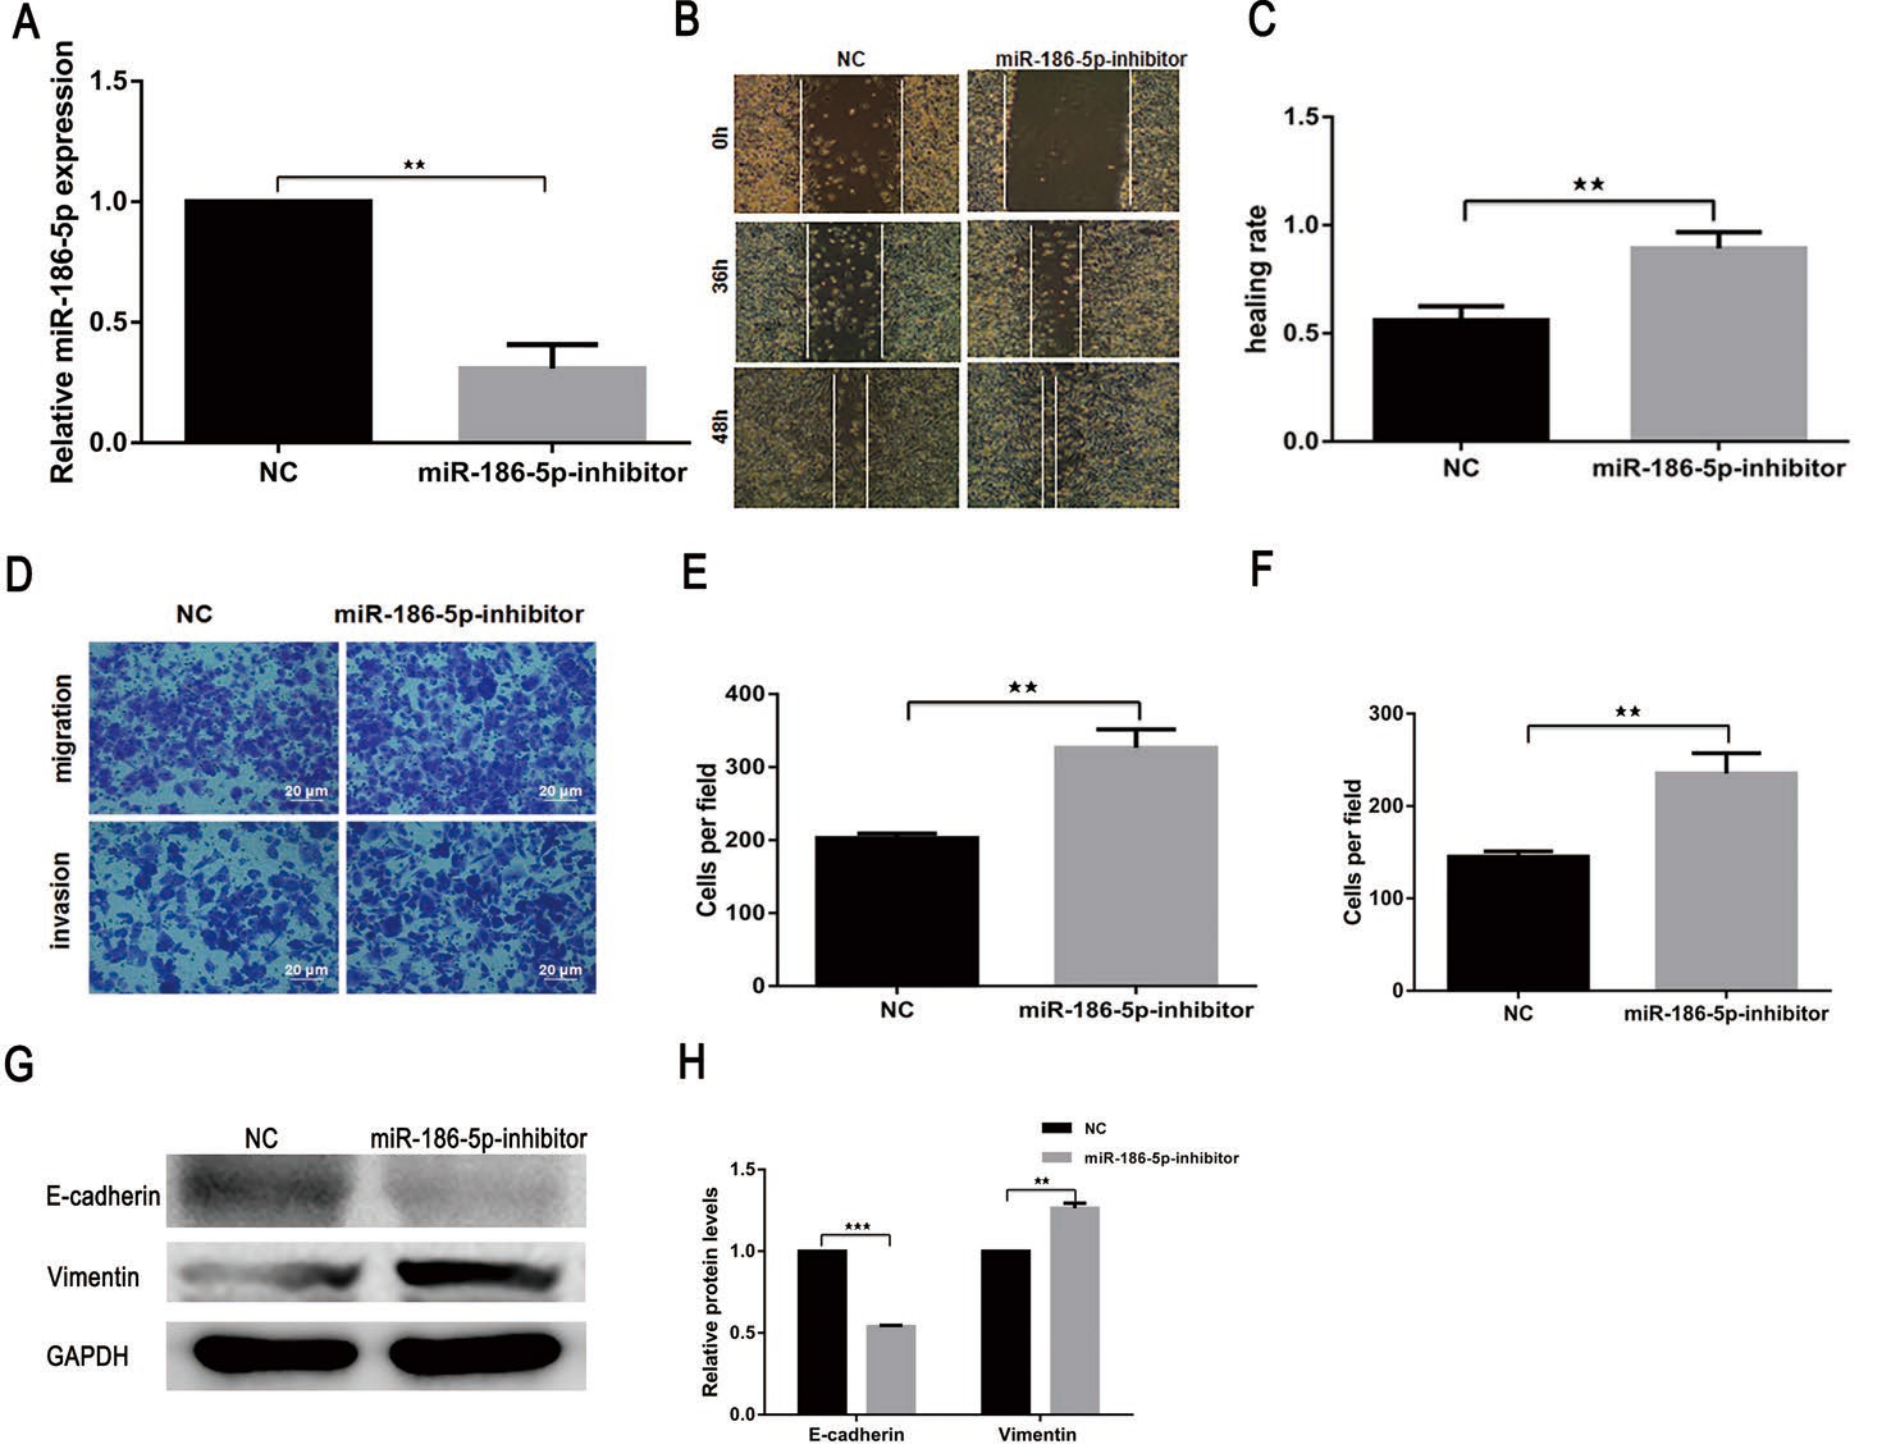

**Figures S1 miR-186-5p inhibition promotes EOC cell migration, invasion and EMT.**

**A** The expression levels of miR-186-5p in SKOV3 transfected with miR-186-5p inhibitor or NC by RT-qPCR.

**B** Wound-healing assays were used to examined the migration ability of SKOV3 after transfected with miR-186-5p inhibitor or NC.

**C** The statistical graph indicates the healing rate. The results are presented as the mean  $\pm$  SD from three independent experiments.

**D** Transwell assays were performed to analysis the migration and invasion ability of SKOV3 after transfected with miR-186-5p inhibitor or NC.

**E/F** The statistical graph indicates the number of cells averaged from 8 random high power fields after SKOV3 after transfected with miR-186-5p inhibitor or NC.

**G/H** The change of the protein levels of EMT-related genes after transfected with miR-186-5p inhibitor or NC.

Data were expressed as means  $\pm$  SD from three independent experiments.  $\star p < 0.05$ ,  $\star\star p < 0.01$ ,  $\star\star\star p < 0.001$ .
