# Supplementary material for: HOXD-AS1 promotes the epithelial to mesenchymal transition of ovarian cancer cells by regulating miR-186-5p and PIK3R3
Source: Springer Nature journal article supplement (doi:10.1186/s13046-019-1103-5), 2019-03-01
Supplement: MOESM3 [file 16520600]

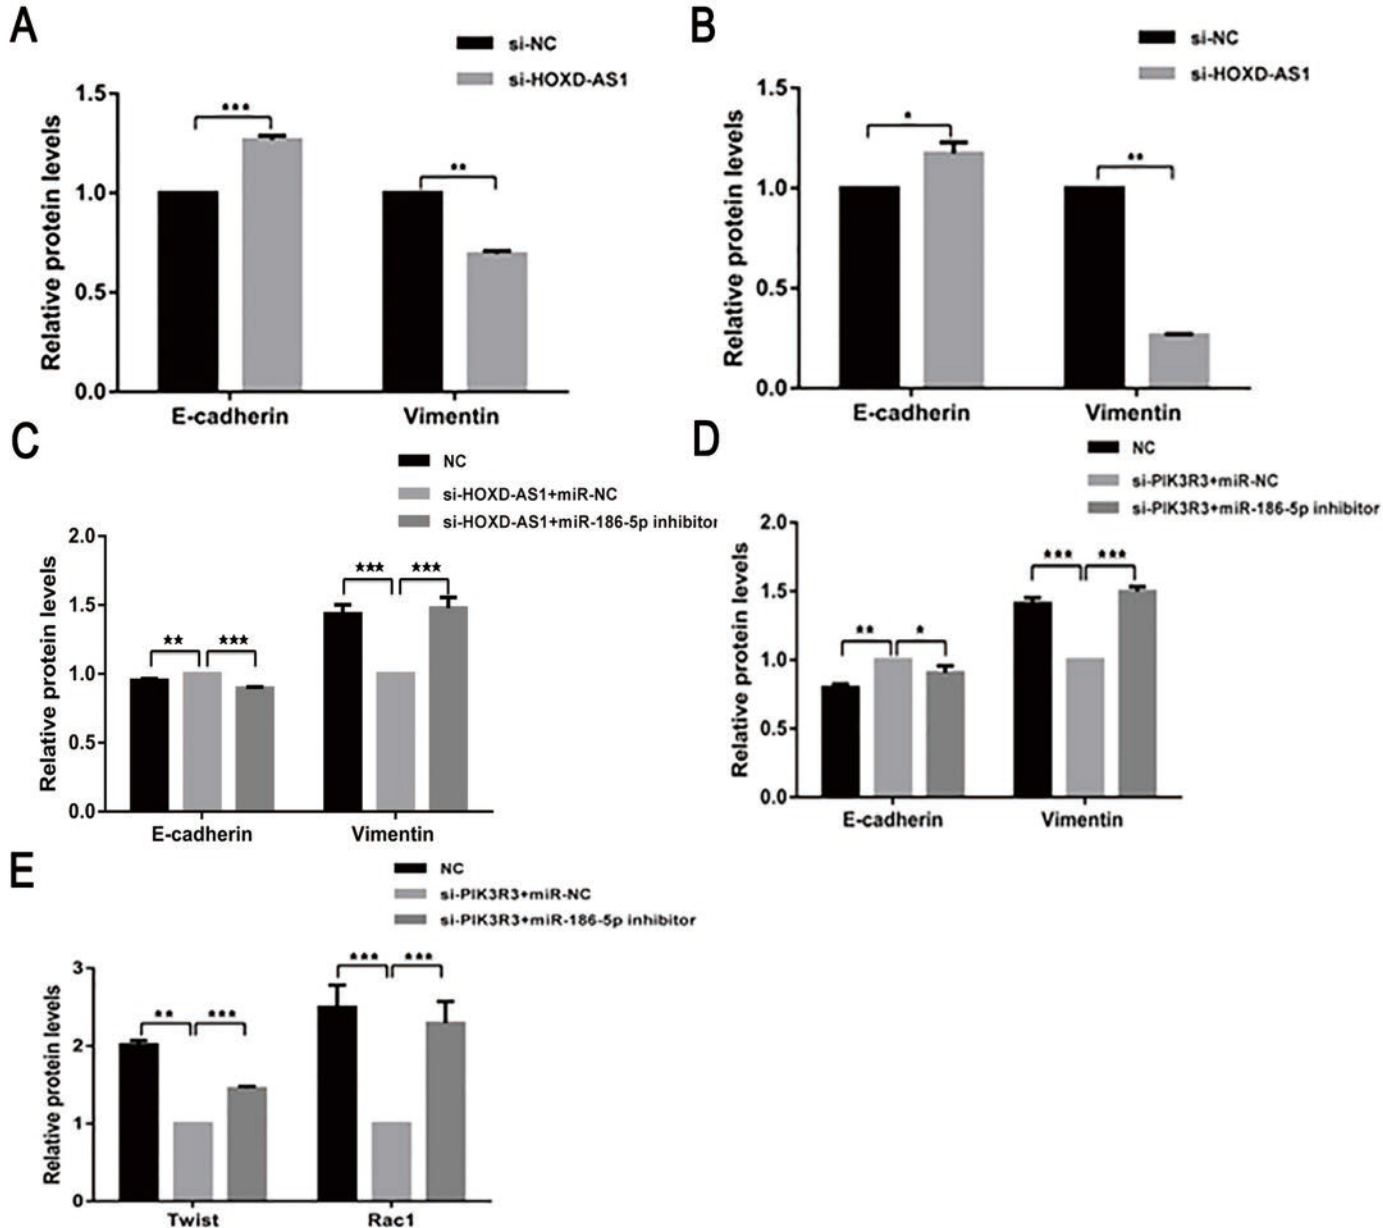

**Figures S2 The statistical graph of western-blot.**

**A/B** The statistical graph indicates the protein levels of EMT-related genes (E-cadherin, vimentin) in SKOV3 and A2780 cells transfected with HOXD-AS1 siRNAs or NC using western blot.

**C** The statistical graph indicates the protein levels of EMT-related genes (E-cadherin, vimentin) after SKOV3 cells transfected with si-NC, si-HOXD-AS1 with miR-NC or miR-186-5p inhibitor.

**D** The statistical graph indicates the protein levels of EMT-related genes (E-cadherin, vimentin) after SKOV3 cells transfected with si-NC, si-PIK3R3 with miR-NC or miR-186-5p inhibitor.

**E** The statistical graph indicates the protein levels of Twist and Rac1 after SKOV3 cells transfected with si-NC, si-PIK3R3 with miR-NC or miR-186-5p inhibitor.

Results were represented as protein intensity relative to GAPDH. Data were expressed as means  $\pm$  SD from three independent experiments.  $\star p < 0.05$ ,  $\star\star p < 0.01$ ,  $\star\star\star p < 0.001$ .
